# Supplementary material
Source: MDPI journal article supplement (https://www.mdpi.com/2410-3888/8/6/300)
Supplement: s1 [file s1]

## Supplementary:

**Supplementary Table S1.** Measurements of *Megachasma pelagios* specimens used in the analyses. All measurements are in mm.

| Specimen                | MZB12906          | Uncatalogued Brazil specimen | SIO 07-53                  | BPBM 22730                                 | Uncatalogued Ibaraki specimen | WAM P.29940-001         | Uncatalogued Mikizaki specimen | NMMBP8950         | ASIZP0071582      |
|-------------------------|-------------------|------------------------------|----------------------------|--------------------------------------------|-------------------------------|-------------------------|--------------------------------|-------------------|-------------------|
| Source                  | White et al. [27] | Amorim et al. [23]           | Castillo-Géniz et al. [29] | Taylor et al. [1]; Berra and Hutchins [25] | Sawamoto and Matsumoto [30]   | Berra and Hutchins [25] | Yano et al. [26]               | Lee and Shao [28] | Lee and Shao [28] |
| Ontogenetic stage       | Juvenile          | Juvenile                     | Juvenile                   | Adult                                      | Subadult                      | Adult                   | Adult                          | Adult             | Adult             |
| Sex                     | Male              | Male                         | Female                     | Male                                       | Female                        | Male                    | Female                         | Female            | Female            |
| Body Length             | 1767              | 1900                         | 2265                       | 4460                                       | 3667                          | 5150                    | 5440                           | 4870              | 4830              |
| Precaudal length        | 1144              | 1230                         | 1450                       | 3090                                       | 2536                          | 3430                    | 3830                           | 3390              | 3235              |
| Presecond dorsal length | 893               | 980                          | 1140                       | 2530                                       | 2064                          | 2720                    | 2970                           | 2830              | 2540              |
| Prepelvic length        | -                 | -                            | -                          | 2270                                       | 1911                          | 2510                    | 3040                           | 2540              | 2415              |
| Prefirst dorsal length  | 536               | 560                          | 730                        | 1540                                       | 1120                          | 1670                    | 1860                           | 1700              | 1620              |
| Prepectoral fin length  | 425               | 453                          | 550                        | 1110                                       | 897                           | 1390                    | 1570                           | 1270              | 1283              |
| Head length             | 430               | 462                          | 575                        | 1180                                       | 932                           | 1320                    | 1560                           | 1320              | 1260              |
| Prebranchial            | 329               | 340                          | 350                        | 850                                        | 678                           | 1090                    | 1130                           | 990               | 920               |

|                                 |       |     |     |      |      |      |      |      |      |
|---------------------------------|-------|-----|-----|------|------|------|------|------|------|
| length                          |       |     |     |      |      |      |      |      |      |
| Prespiracular length            | 181   | 199 | 220 | 450  | 345  | 935  | 700  | 500  | 498  |
| Eye length (horizontal)         | 32.2  | 32  | 32  | 56   | 50   | 56   | 60   | 57   | 70   |
| Preorbital length               | 92.2  | 89  | 110 | 240  | 197  | 350  | 460  | 240  | 240  |
| Prenarial length                | 32.1  | 32  | 40  | 100  | 103  | 105  | 260  | -    | 83   |
| Preoral length                  | 16.9  | 15  | 13  | 66   | 20   | 60   | -    | -    | -    |
| Mouth width                     | 231   | 220 | 279 | 827  | 536  | 580  | 700  | 930  | 730  |
| Internarial distance            | 113.9 | 120 | 145 | 340  | 274  | 400  | 450  | 390  | 420  |
| Dorsal caudal margin            | 623   | 670 | 744 | 1443 | 1340 | 1730 | 1660 | 1690 | 1613 |
| Preventral caudal margin        | 268   | 311 | 324 | 625  | 538  | 720  | 780  | 670  | 650  |
| Upper postventral caudal margin | 421   | 410 | 490 | 1220 | 1040 | 1210 | 1200 | -    | -    |
| Lower postventral caudal margin | 145   | 200 | 150 | 377  | 346  | 430  | 450  | 350  | 380  |
| Terminal caudal lobe            | 33    | 50  | 50  | 96   | 90   | 105  | 170  | 90   | 104  |

|                                |       |     |     |     |     |     |      |     |     |
|--------------------------------|-------|-----|-----|-----|-----|-----|------|-----|-----|
| First dorsal<br>base           | 113.8 | 170 | 160 | 404 | 396 | 500 | 450  | 410 | 360 |
| First dorsal<br>height         | 87    | 128 | 141 | 226 | 220 | 250 | 270  | 295 | 252 |
| Second<br>dorsal base          | 67    | 73  | 90  | 191 | 168 | 255 | 300  | 220 | 200 |
| Second<br>dorsal<br>height     | 87    | 50  | 50  | 104 | 102 | 100 | 140  | 130 | 105 |
| Pectoral fin<br>base           | 93    | 109 | 110 | 262 | 275 | 330 | 370  | 300 | 350 |
| Pectoral<br>anterior<br>margin | 337   | 379 | 390 | 837 | 736 | 990 | 1060 | 910 | 970 |
| Pectoral fin<br>height         | 315   | 335 | 350 | -   | 626 | 870 | 940  | -   | -   |

**Supplementary Table S2.** Slopes and associated statistics for bivariate regressions of Log<sub>10</sub>-transformed trait measurements from *Megachasma pelagios*.

| Comparison (x : y)                 | Number of specimens | Slope (m) | 95% CI m      | Intercept (b) | 95% CI b        | R <sup>2</sup> | P-value | Growth trend |
|------------------------------------|---------------------|-----------|---------------|---------------|-----------------|----------------|---------|--------------|
| Body length : Head length          | 9                   | 1.103     | 1.057~1.149   | -0.9553       | -1.118~-0.7922  | 0.9978         | <0.0001 | Positive     |
| Body length : Prebranchial length  | 9                   | 1.155     | 1.013~1.298   | -1.276        | -1.782~-0.7702  | 0.9813         | <0.0001 | Positive     |
| Body length : Internarial distance | 9                   | 1.245     | 1.159~1.332   | -2.002        | -2.309~-1.694   | 0.9940         | <0.0001 | Positive     |
| Body length : Prespiracular length | 9                   | 1.205     | 0.8384~1.572  | -1.684        | -2.986~-0.3819  | 0.8962         | 0.0001  | Positive?    |
| Body length : Preorbital length    | 9                   | 1.243     | 0.9365~1.549  | -2.121        | -3.209~-1.033   | 0.9293         | <0.0001 | Positive?    |
| Body length : Prenarial length     | 8                   | 1.424     | 0.8036~2.044  | -3.151        | -5.342~-0.9602  | 0.8403         | 0.0014  | Positive?    |
| Body length : Mouth width          | 9                   | 1.190     | 0.8426~1.537  | -1.526        | -2.759~-0.2935  | 0.9037         | <0.0001 | Positive?    |
| Body length : Preoral length       | 6                   | 1.381     | 0.2888~2.474  | -3.388        | -7.182~0.4068   | 0.7549         | 0.0247  | Positive?    |
| Body length : Eye length           | 9                   | 0.6507    | 0.4732~0.8283 | -0.6279       | -1.258~0.002742 | 0.9148         | <0.0001 | Negative     |
| Body length : Precaudal length     | 9                   | 1.070     | 1.033~1.106   | -0.4204       | -0.5497~-0.2911 | 0.9986         | <0.0001 | Positive     |
| Body length : Prefirst dorsal      | 9                   | 1.114     | 1.050~1.179   | -0.8952       | -1.124~-0.6669  | 0.9958         | <0.0001 | Positive     |

|                                 |   |        |              |         |                 |        |         |          |
|---------------------------------|---|--------|--------------|---------|-----------------|--------|---------|----------|
| length                          |   |        |              |         |                 |        |         |          |
| Body length :                   |   |        |              |         |                 |        |         |          |
| Presecond dorsal length         | 9 | 1.076  | 1.001~1.152  | -0.5446 | -0.8134~-0.2759 | 0.9939 | <0.0001 | Positive |
| Body length :                   |   |        |              |         |                 |        |         |          |
| Prepectoral length              | 9 | 1.120  | 1.048~1.192  | -1.018  | -1.274~-0.7626  | 0.9949 | <0.0001 | Positive |
| Body length :                   |   |        |              |         |                 |        |         |          |
| Prepelvic length                | 6 | 1.004  | 0.6213~1.387 | -0.3040 | -1.710~1.102    | 0.9298 | 0.0019  | Isometry |
| Body length :                   |   |        |              |         |                 |        |         |          |
| First dorsal base length        | 9 | 1.161  | 0.8637~1.458 | -1.649  | -2.705~-0.5929  | 0.9241 | <0.0001 | Isometry |
| Body length :                   |   |        |              |         |                 |        |         |          |
| First dorsal height             | 9 | 0.8800 | 0.6585~1.102 | -0.8333 | -1.620~-0.04657 | 0.9265 | <0.0001 | Isometry |
| Body length :                   |   |        |              |         |                 |        |         |          |
| Second dorsal height            | 9 | 0.6622 | 0.2332~1.091 | -0.3876 | -1.911~1.136    | 0.6558 | 0.0082  | Isometry |
| Body length :                   |   |        |              |         |                 |        |         |          |
| Second dorsal base length       | 9 | 1.229  | 1.079~1.379  | -2.173  | -2.706~-1.640   | 0.9817 | <0.0001 | Positive |
| Body length :                   |   |        |              |         |                 |        |         |          |
| Pectoral base length            | 9 | 1.224  | 1.008~1.440  | -2.005  | -2.771~-1.239   | 0.9626 | <0.0001 | Positive |
| Body length :                   |   |        |              |         |                 |        |         |          |
| Pectoral anterior margin length | 9 | 1.031  | 0.9203~1.142 | -0.8263 | -1.219~-0.4334  | 0.9858 | <0.0001 | Isometry |
| Body length :                   |   |        |              |         |                 |        |         |          |
| Pectoral height                 | 6 | 0.9923 | 0.8254~1.159 | -0.7432 | -1.326~-0.1608  | 0.9855 | <0.0001 | Isometry |

|                                                                  |   |        |               |         |                 |        |         |          |
|------------------------------------------------------------------|---|--------|---------------|---------|-----------------|--------|---------|----------|
| Body length :<br>Dorsal caudal<br>margin length                  | 9 | 0.9533 | 0.8414~1.065  | -0.3056 | -0.7033~0.09203 | 0.9830 | <0.0001 | Isometry |
| Body length :<br>Upper<br>postventral<br>caudal margin<br>length | 7 | 1.088  | 0.8133~1.363  | -0.9321 | -1.897~0.03324  | 0.9540 | 0.0002  | Isometry |
| Body length :<br>Terminal caudal<br>lobe length                  | 9 | 1.038  | 0.7062~1.370  | -1.785  | -2.964~-0.6063  | 0.8866 | 0.0001  | Isometry |
| Body length :<br>Preventral<br>caudal margin<br>length           | 9 | 0.9065 | 0.8343~0.9766 | -0.5094 | -0.7656~-0.2531 | 0.9921 | <0.0001 | Negative |
| Body length :<br>Lower<br>postventral<br>caudal margin<br>length | 9 | 0.9419 | 0.6721~1.212  | -0.8786 | -1.837~0.07965  | 0.9069 | <0.0001 | Isometry |

**Supplementary Figure S1.** Bivariate regressions of Log<sub>10</sub>-transformed *Megachasma pelagios* head measurements against the Log<sub>10</sub>-transformed total body length. A. Head length. B. Prebranchial length. C. Internarial distance. D. Prespiracular length; E. Preorbital length; F. Prenarial length; G. Mouth width; H. Preoral length; I. Eye length.

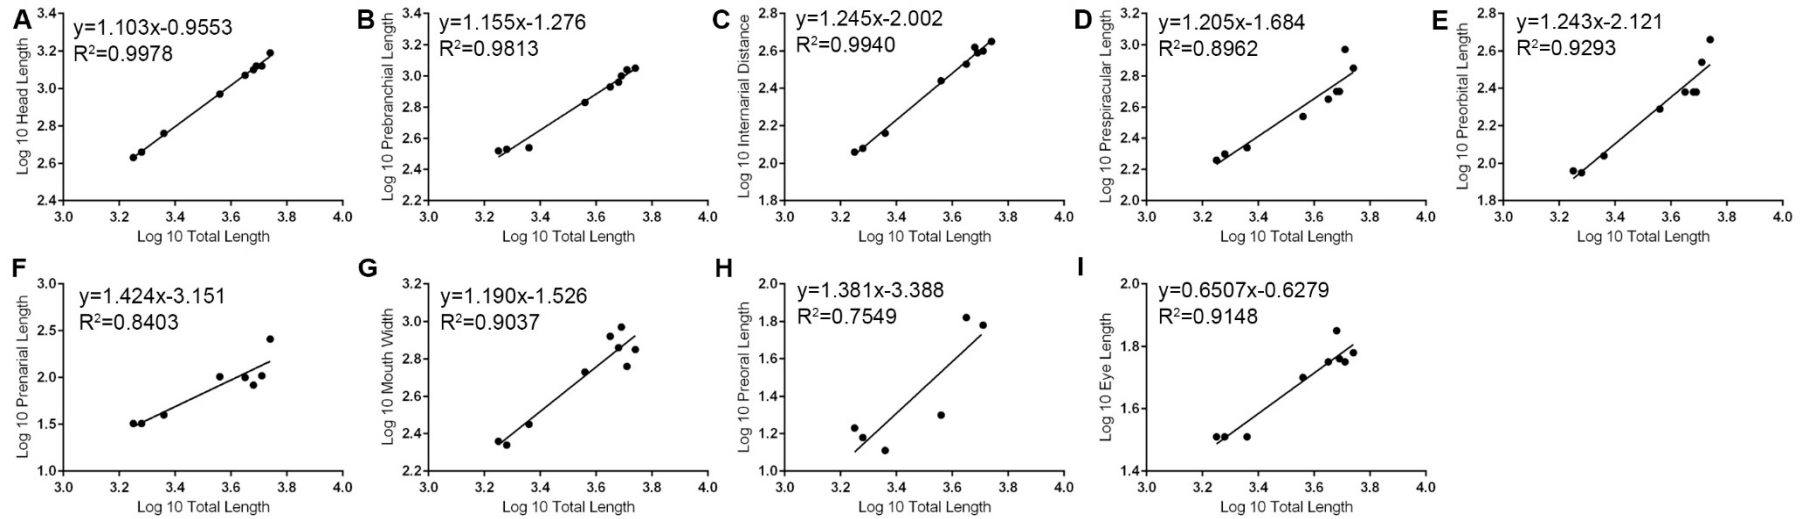

**Supplementary Figure S2.** Bivariate regressions of Log<sub>10</sub>-transformed *Megachasma pelagios* body measurements against the Log<sub>10</sub>-transformed total body length. A. Precaudal length. B. Prefirst dorsal length. C. Presecond dorsal length. D. Prepectoral length; E. Prepelvic length.

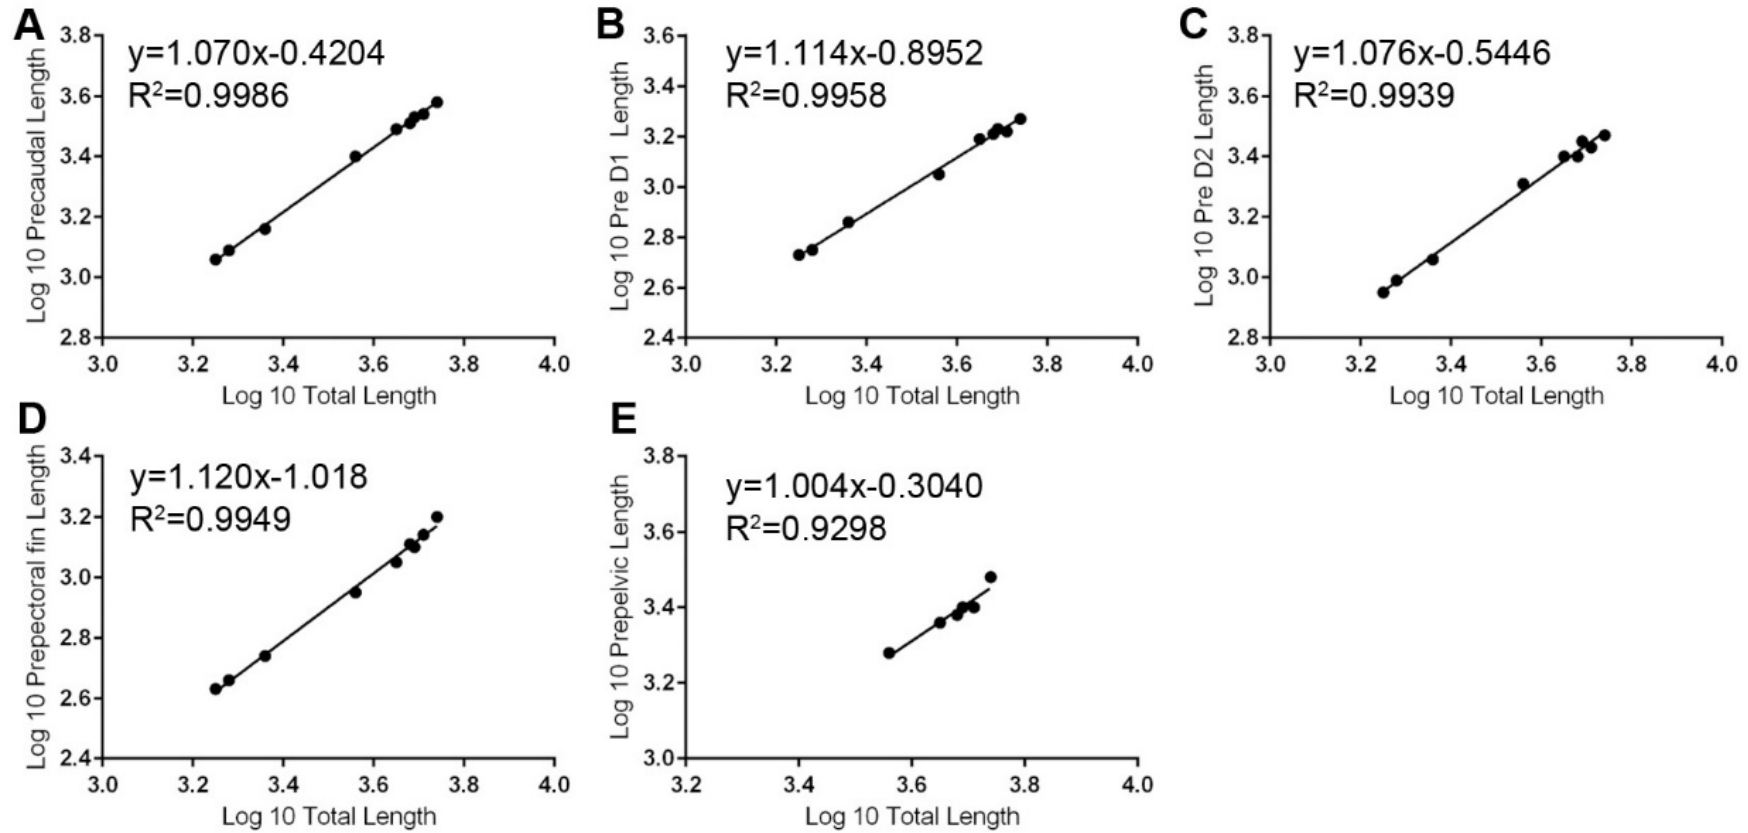



**Supplementary Figure S3.** Bivariate regressions of Log<sub>10</sub>-transformed *Megachasma pelagios* dorsal fin measurements against the Log<sub>10</sub>-transformed total body length. A. First dorsal base length. B. First dorsal height. C. Second dorsal height. D. Second dorsal base length.

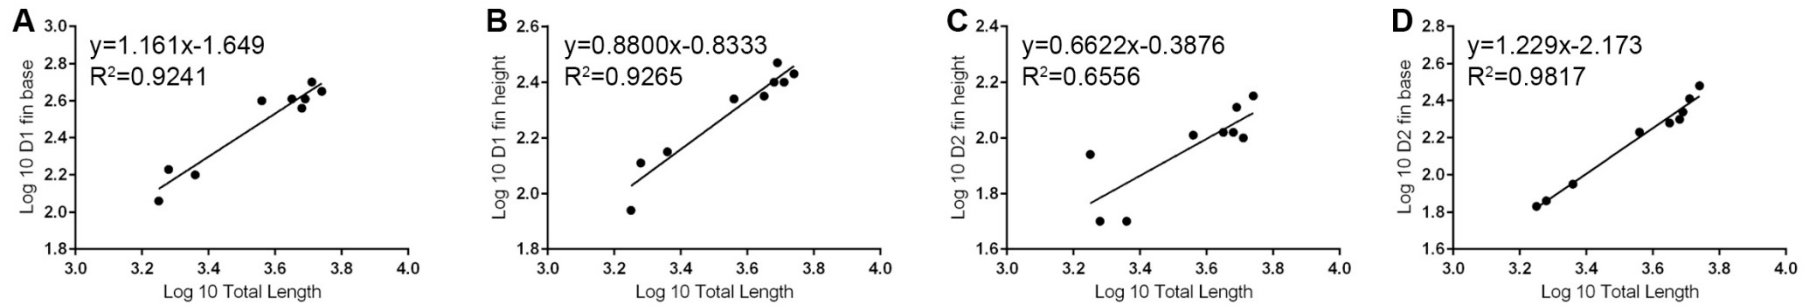

**Supplementary Figure S4.** Bivariate regressions of Log<sub>10</sub>-transformed *Megachasma pelagios* caudal fin measurements against the Log<sub>10</sub>-transformed total body length. A. Dorsal caudal margin length. B. Upper postventral caudal margin length. C. Terminal caudal lobe length. D. Preventral caudal margin length. E. Lower postventral caudal margin length.

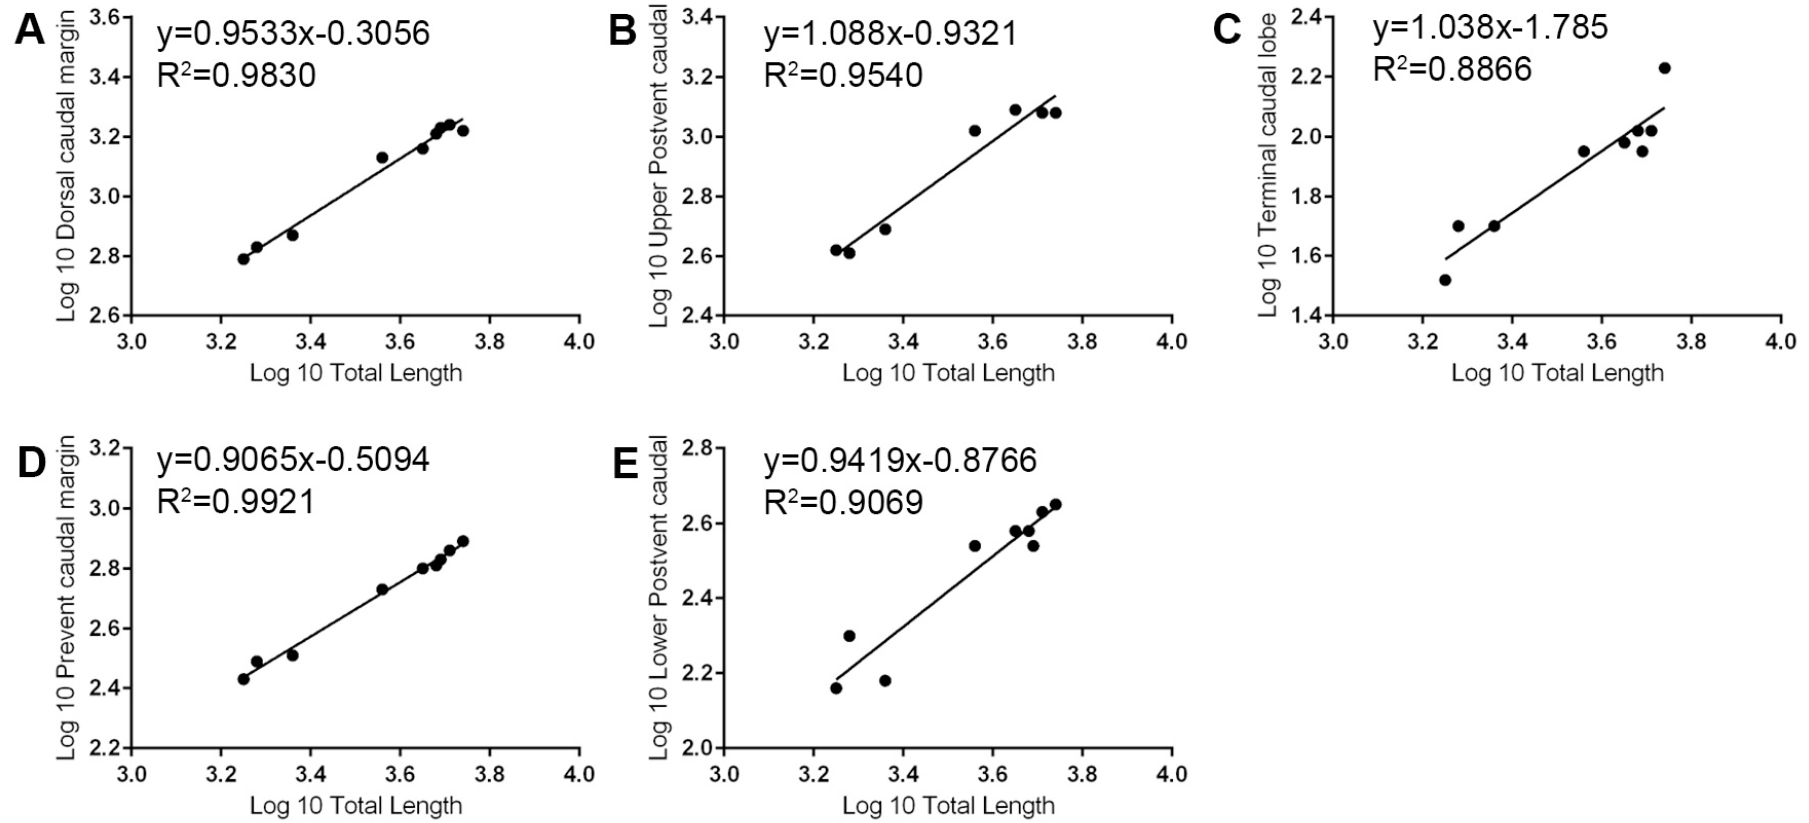

## References

1. Taylor, L.R.; Compagno, L.J.V.; Struhsaker, P.J. Megamouth—A new species, genus, and family of lamnoid shark (*Megachasma pelagios*, family Megachasmidae) from the Hawaiian Islands. *Proc. Calif. Acad. Sci.* **1983**, *43*, 87–110.
23. Amorim, A.F.; Arfeli, C.A.; Castro, J.I. Description of a juvenile megamouth shark, *Megachasma pelagios*, caught off Brazil. *Environ. Biol. Fishes* **2000**, *59*, 117–123.
25. Berra, T.M.; Hutchins, J.B. A specimen of megamouth shark, *Megachasma pelagios* (Megachasmidae) from Western Australia. *Rec. West. Aust. Mus.* **1990**, *14*, 651–656.
26. Yano, K.; Yabumoto, Y.; Tanaka, S.; Tsukada, O.; Furuta, M. Capture of a mature female megamouth shark, *Megachasma pelagios*, from Mie, Japan. In Proceedings of the 5th Indo-Pacific Conference, Nouméa, New Caledonia, 3–8 November 1997; pp. 335–349.
27. White, W.T.; Fahmi, M.A.; Sumadhiharga, K. A juvenile megamouth shark *Megachasma pelagios* (Lamniformes: Megachasmidae) from Northern Sumatra, Indonesia. *Raffles Bull. Zool.* **2004**, *52*, 603–607.
28. Lee, P.F.; Shao, K.T. Two new records of Lamniform shark from the waters adjacent to Taiwan. *J. Fish. Soc. Taiwan* **2009**, *36*, 303–311.
29. Castillo-Géniz, J.L.; Ocampo-Torres, A.I.; Shimada, K.; Rigsby, C.K.; Nicholas, A.C. Juvenile megamouth shark, *Megachasma pelagios*, caught off the Pacific coast of Mexico, and its significance to chondrichthyan diversity in Mexico. *Cienc. Mar.* **2012**, *38*, 467–474.
30. Sawamoto, S.; Matsumoto, R. Stomach contents of a megamouth shark *Megachasma pelagios* from the Kuroshio Extension: Evidence for feeding on a euphausiid swarm. *Plankton Benthos Res.* **2012**, *7*, 203–206.
